# Supplementary material
Source: PubMed Central journal article supplement (PMC3502047)
Supplement: NIHMS85088-supplement-supp1.pdf [file NIHMS85088-supplement-supp1.pdf]

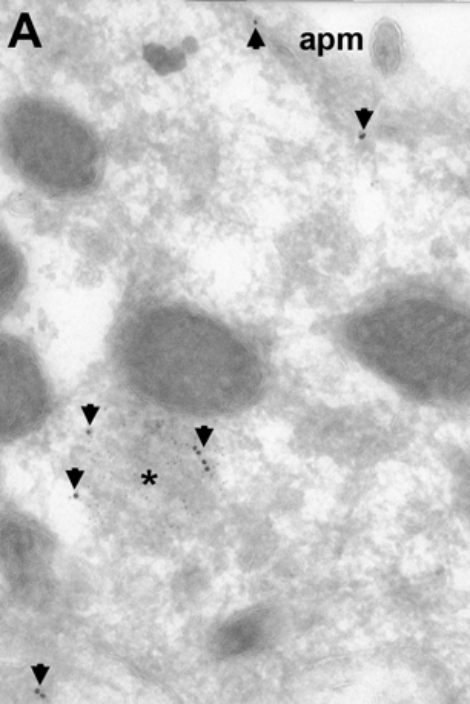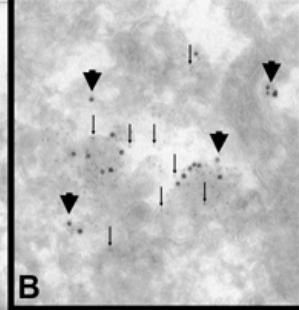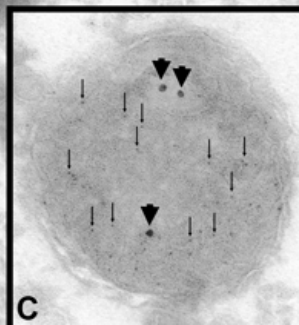

**Supplemental table 1**

| Name of Intracellular marker | Localization             | Rtotal | SE    |
|------------------------------|--------------------------|--------|-------|
| E-cadherin                   | Basolateral membrane     | -0.253 | 0.026 |
| GS28                         | Medial golgi             | -0.243 | 0.017 |
| GM130                        | Cis golgi matrix         | -0.240 | 0.014 |
| p115                         | Cis golgi                | -0.262 | 0.011 |
| Vti1a                        | Trans golgi network      | -0.177 | 0.022 |
| EEA1                         | Early endosomes          | -0.216 | 0.020 |
| Adaptin-beta                 | Clathrin coated vesicles | 0.004  | 0.041 |
| Cathepsin D                  | Lysozomes                | -0.141 | 0.024 |
| Total AQP2                   | -                        | 0.369  | 0.057 |
